# Supplementary material for: Ruthenium photoredox-triggered phospholipid membrane formation
Source: Royal Society of Chemistry journal article supplement (doi:10.1039/c6ob00290k), 2016-01-01
Supplement: c6ob00290k1.pdf [file c6ob00290k1.pdf]

## Supplementary Information

# Ruthenium Photoredox-Triggered Phospholipid Membrane Formation

M. D. Hardy,<sup>a</sup> D. Konetski<sup>b</sup>, C. N. Bowman<sup>b</sup>, and N. K. Devaraja<sup>a</sup>

<sup>a</sup>*Department of Chemistry and Biochemistry, University of California, San Diego, CA 92093*

<sup>b</sup>*Department of Chemical and Biological Engineering, University of Colorado, Boulder, Boulder, CO 80309*

|                       |     |
|-----------------------|-----|
| Materials and Methods | 2-3 |
| Supporting Figures    | 4-7 |
| References            | 8   |

## Materials

Triethylamine ( $\geq 99\%$ ), Copper sulfate pentahydrate ( $\geq 98\%$ ), and  $\text{Ru}(\text{bpy}_3)^{2+}$  were purchased from Sigma Aldrich. Rhodamine DHPE was purchased from Invitrogen. Alkyne lysolipid and alkyl azide were synthesized as reported previously (1, 2).

## Methods

### *$\text{Ru}(\text{bpy}_3)^{2+}$ Photoredox-Triggered Triazole Phospholipid Synthesis*

Preparation of a 1 mM dodecane azide and 650  $\mu\text{M}$  alkyne lysolipid solution was prepared by adding 43.3  $\mu\text{L}$  of a 15 mM alkyne lysolipid in chloroform stock and 27  $\mu\text{M}$  of 40 mM alkyl azide in chloroform stock to a 2 mL LCMS vial. The chloroform was evaporated under a gentle stream of nitrogen. To the remaining residue of pure alkyne lysolipid and alkyl azide, 1 ml of water was added. The solution was briefly vortexed and then sonicated in a bath sonicator (3510 Branson) for 15 minutes.

Reactions were prepared by mixing together the alkyne-azide solution, a triethylamine in ethanol solution, a copper sulfate in water solution, and a  $\text{Ru}(\text{bpy}_3)^{2+}$  in water solution in a 2 mL LCMS vial containing a 250  $\mu\text{L}$  insert. The 75  $\mu\text{L}$  reaction consisted of 72  $\mu\text{L}$  of the alkyne-azide solution, 0.5  $\mu\text{L}$  of 30 mM triethylamine, 1.0  $\mu\text{L}$  of 15 mM copper sulfate and 1.5  $\mu\text{L}$  of 2 mM  $\text{Ru}(\text{bpy}_3)^{2+}$ . The reaction was placed on a shaker rotating at 100 rev/min and placed  $\sim 8''$  from an 11 watt CFL. Triethylamine,  $\text{Ru}(\text{bpy}_3)^{2+}$  and alkyne-azide solutions were prepared fresh daily.

Starting reaction conditions: 40  $\mu\text{M}$   $\text{Ru}(\text{bpy}_3)^{2+}$ , 200  $\mu\text{M}$  triethylamine, 200  $\mu\text{M}$  copper sulfate pentahydrate, 1 mM dodecane azide and 650  $\mu\text{M}$  alkyne lysolipid.

### *Effect of triethylamine on Triazole Phospholipid Synthesis*

Reactions were prepared as described in the previous section with the following changes. Serial dilutions of a 30 mM triethylamine in ethanol solution were performed to create stock solutions of 22.5 mM, 15 mM and 7.5 mM, corresponding to reaction concentrations of 200  $\mu\text{M}$ , 150  $\mu\text{M}$ , 100  $\mu\text{M}$  and 50  $\mu\text{M}$ . For the 0  $\mu\text{M}$  TEA control, 0.5  $\mu\text{L}$  of pure ethanol was added in place of a triethylamine in ethanol solution.

Starting reaction concentrations: 40  $\mu\text{M}$   $\text{Ru}(\text{bpy}_3)^{2+}$ , 200  $\mu\text{M}$ , 150  $\mu\text{M}$ , 100  $\mu\text{M}$ , 50  $\mu\text{M}$  or 0  $\mu\text{M}$  triethylamine, 200  $\mu\text{M}$  copper sulfate pentahydrate, 1 mM dodecane azide and 650  $\mu\text{M}$  alkyne lysolipid.

#### *Liquid Chromatography/Mass Spectrometry/Evaporative Light Scattering Detection (LC/MS/ELSD)*

Protocols were based upon previously reported settings and procedures (2). Mass identification of alkyne lysolipid and alkyl azide were reported previously(1, 2).

#### *Cryo-EM microscopy*

Vesicles for Cryo-EM were prepared with the following conditions: 0 or 40  $\mu\text{M}$   $\text{Ru}(\text{bpy}_3)^{2+}$ , 200  $\mu\text{M}$  triethylamine, 200  $\mu\text{M}$  copper sulfate pentahydrate, 1 mM dodecane azide and 750  $\mu\text{M}$  alkyne lysolipid. No vesicles were observed in the negative control (reaction without  $\text{Ru}(\text{bpy}_3)^{2+}$ ). For additional information on negative controls, please see the previously reported discussion on azide emulsions(2). Conditions for freezing: blot time = 5 seconds, glow discharge time = 25 seconds, sample incubation time = 60 seconds.

#### *Fluorescent Microscopy*

Reaction conditions: 40  $\mu\text{M}$   $\text{Ru}(\text{bpy}_3)^{2+}$ , 200  $\mu\text{M}$  triethylamine, 200  $\mu\text{M}$  copper sulfate pentahydrate, 2.5 mM dodecane azide and 2.5 mM alkyne lysolipid. Reactions were exposed to 20  $\text{mW}/\text{cm}^2$  for 1 hour or to 50  $\text{mW}/\text{cm}^2$  for 30 min.

## Supporting Figures

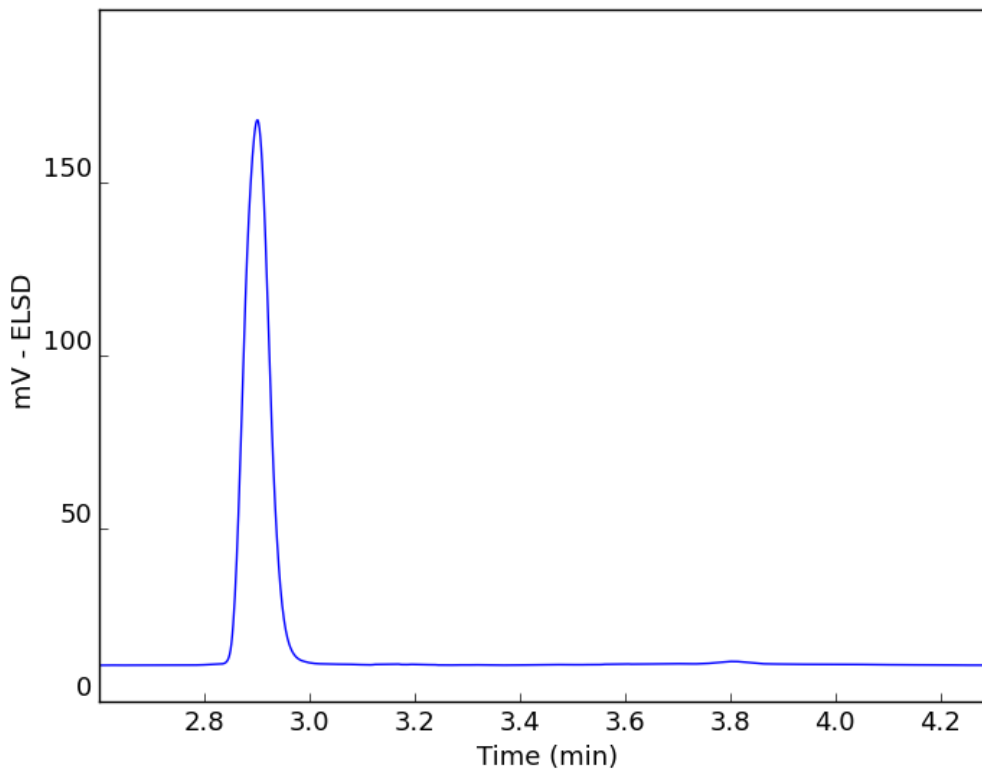

Figure S1. Triazole lipid Synthesis in the absence of  $\text{Ru}(\text{bpy}_3)^{2+}$ . Conditions: 200  $\mu\text{M}$   $\text{CuSO}_4$ , 200  $\mu\text{M}$  TEA, 625  $\mu\text{M}$  alkyne lysolipid, and 1 mM alkyl azide. Alkyne lysolipid retention time = 2.9 min; triazole phospholipid retention time = 3.8 min.

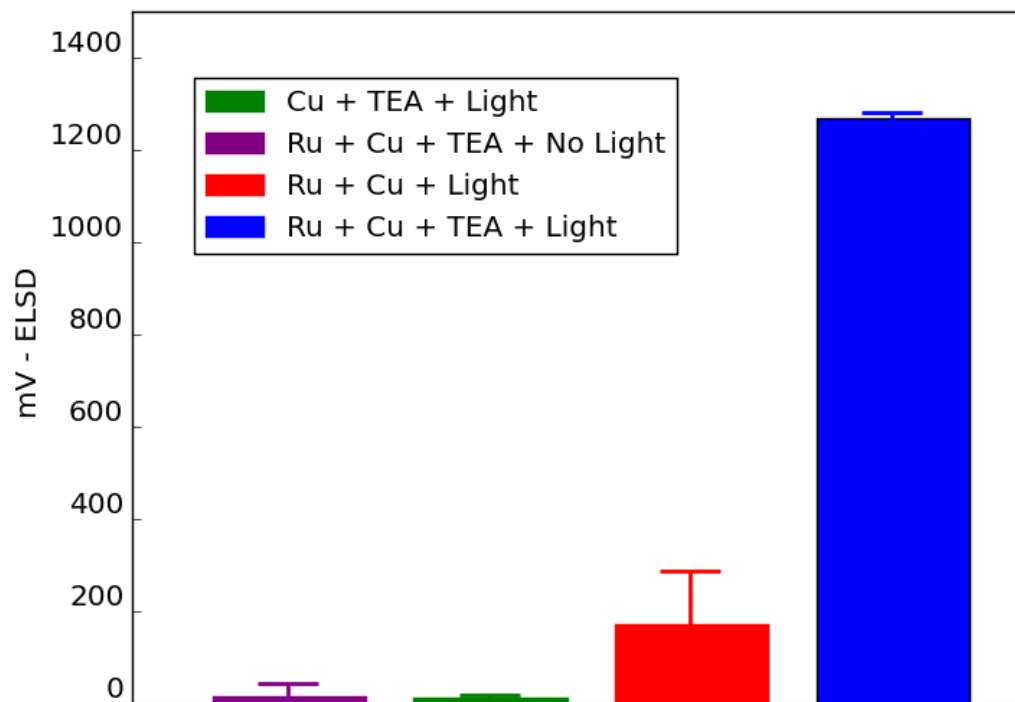

Figure S2. Triazole Lipid Synthesis monitored via ELSD. Conditions: 215  $\mu\text{M}$   $\text{CuSO}_4$ , 33  $\mu\text{M}$   $\text{Ru}(\text{bpy}_3)^{2+}$ , 200  $\mu\text{M}$  TEA, 625  $\mu\text{M}$  alkyne lysolipid, and 1 mM alkyl azide. Results recapitulate absorbance data shown in Figure 1 of the main text.

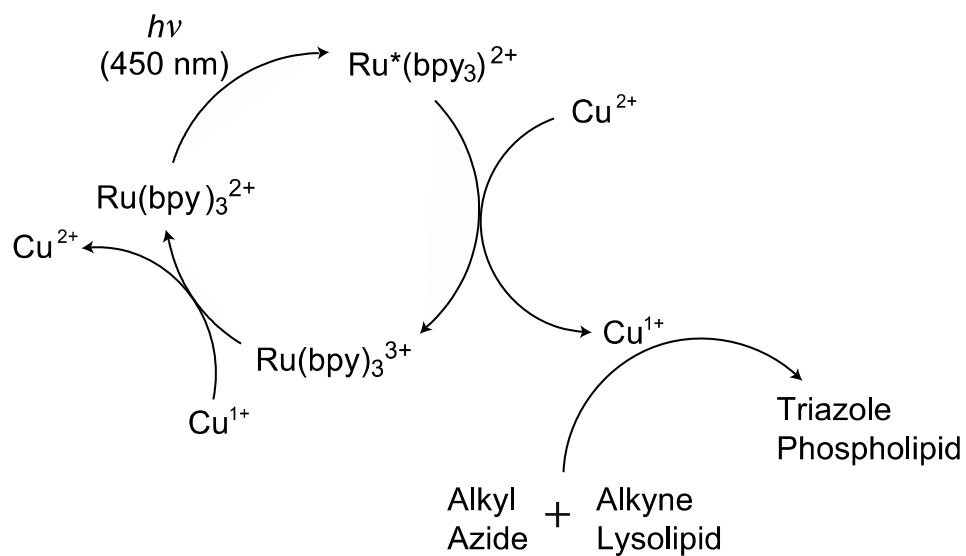

Figure S3. An oxidative quenching Ru(bpy<sub>3</sub>)<sup>2+</sup> scheme. The photoexcited Ru\*(bpy<sub>3</sub>)<sup>2+</sup> is quenched by copper (II), yielding copper(I) and Ru(bpy<sub>3</sub>)<sup>3+</sup>. Ru(bpy<sub>3</sub>)<sup>3+</sup> is a strong oxidant (+1.29V) and can oxidize copper(I) back to copper(II).

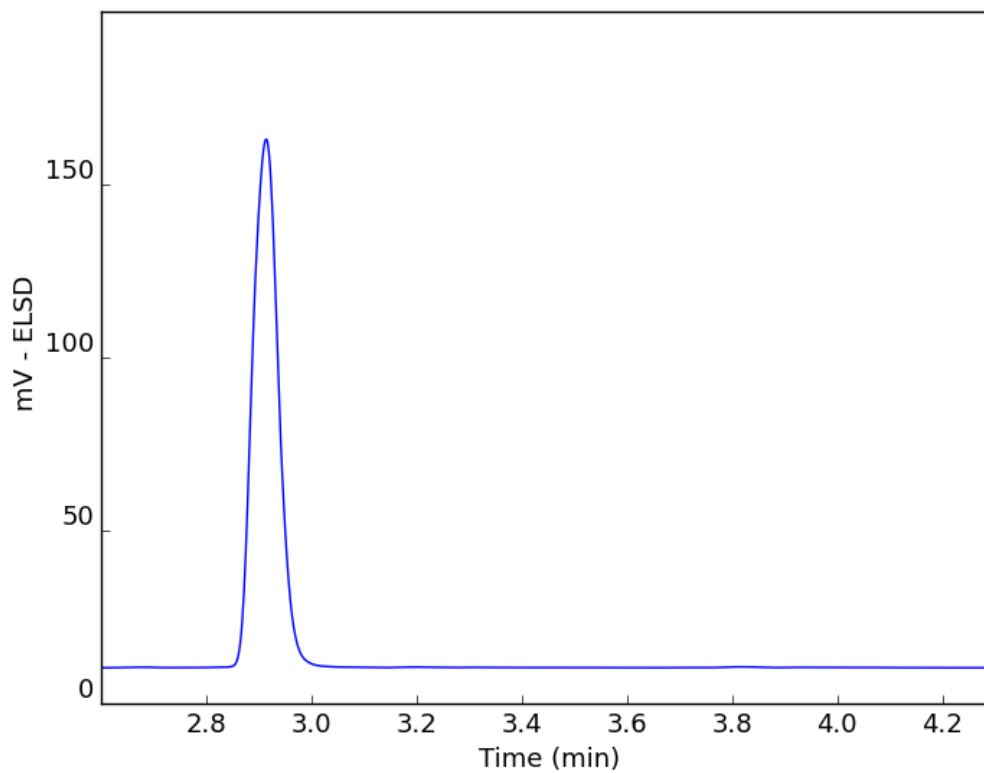

Figure S4. Triazole Lipid Synthesis with 0  $\mu\text{M}$  TEA. Conditions: 200  $\mu\text{M}$   $\text{CuSO}_4$ , 40  $\mu\text{M}$   $\text{Ru}(\text{bpy}_3)^{2+}$ , 625  $\mu\text{M}$  alkyne lysolipid, and 1 mM alkyl azide. Alkyne lysolipid retention time = 2.9 min; triazole phospholipid retention time = 3.8 min.

## References

1. Budin I & Devaraj NK (2012) Membrane assembly driven by a biomimetic coupling reaction. *Journal of the American Chemical Society* 134(2):751-753.
2. Hardy MD, *et al.* (2015) Self-reproducing catalyst drives repeated phospholipid synthesis and membrane growth. *Proceedings of the National Academy of Sciences of the United States of America* 112(27):8187-8192.
